# Supplementary figures and images for: CaF2: A novel electrolyte for all solid-state electrochromic devices
Source: PubMed Central journal article supplement — Environ Sci Ecotechnol. 2022 Mar 8;10:100164. doi: 10.1016/j.ese.2022.100164 (PMC9488006; doi:10.1016/j.ese.2022.100164), 2022-03-08

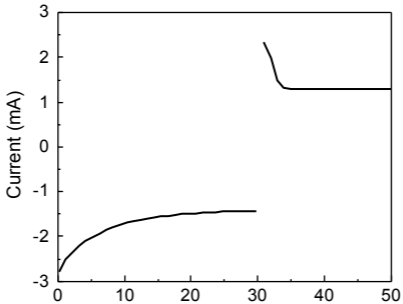

Supplement: mmc2.pdf [file mmc2.pdf]

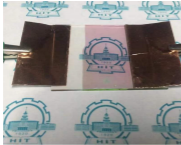

Coloring

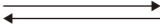

Bleaching

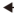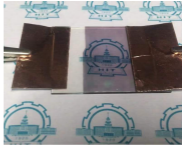

Supplement: mmc3.pdf [file mmc3.pdf]

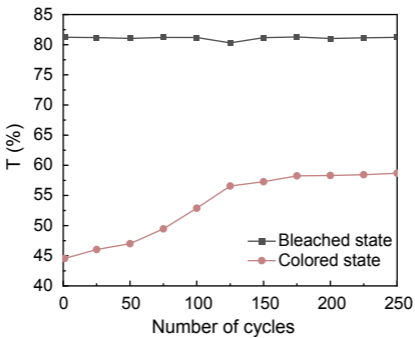

Supplement: mmc4.pdf [file mmc4.pdf]

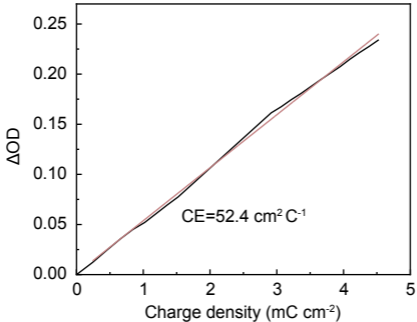

Supplement: mmc5.pdf [file mmc5.pdf]
